# Supplementary material for: The “Vesicular Intelligence” Strategy of Blood Cancers
Source: Genes (Basel). 2021 Mar 13;12(3):416. doi: 10.3390/genes12030416 (PMC7999060; doi:10.3390/genes12030416)
Supplement: Supplementary file 1 [file genes-12-00416-s001.pdf]

**Supplementary Table S1.** Summary of current studies on EVs as biomarkers

| <b>Disease</b> | <b>Source</b> | <b>Cargo</b>                                                  | <b>Role</b>           | <b>Reference</b> |
|----------------|---------------|---------------------------------------------------------------|-----------------------|------------------|
| AML            | serum         | TGF- $\beta$ 1, CD34, CD33, CD117                             | Prognostic            | [21]             |
| AML            | serum         | miR-150<br>miR-155<br>miR-1246                                | Prognostic            | [23]             |
| AML            | serum         | miR-125b                                                      | Prognostic            | [24]             |
| AML            | serum         | miR-10b                                                       | Prognostic            | [25]             |
| CLL            | serum         | CD19, CD37                                                    | Prognostic            | [27]             |
| CLL            | plasma        | S100-A9 protein                                               | Prognostic            | [29]             |
| CLL            | plasma        | CD52                                                          | Prognostic            | [30]             |
| CLL            | plasma        | miR-150, miR-155, miR-223, miR-29<br>CD37, CD9, CD63          | Diagnostic            | [31]             |
| CLL            | plasma        | mc-COX2                                                       | Prognostic            | [33]             |
| MF             | plasma        | CD61, CD62P                                                   | Prognostic            | [34]             |
| MM             | serum         | CD38, CD138, CD44, CD147                                      | Prognostic            | [37]             |
| MM             | serum         | let-7b and miR-18a                                            | Prognostic            | [40]             |
| nHL /HL        | plasma        | CD20/CD30                                                     | Diagnostic/Prognostic | [20]             |
| Lymphoma       | plasma        | CD20                                                          | Prognostic            | [43]             |
| HL             | plasma        | miR-23p<br>miR-127-3p<br>miR-21-5p<br>miR-155-5p<br>let-7a-5p | Diagnostic            | [44]             |
| Lymphoma       | plasma        | BCL-6<br>c-myc                                                | Prognostic            | [45]             |

**Supplementary Table S2.** Summary of current studies on EVs: re-education of the bone marrow niche

| <b>Disease</b> | <b>EV<br/>origin/Source</b> | <b>Target</b>     | <b>Cargo</b>                  | <b>Functional effects</b>                                                                                               | <b>Reference</b> |
|----------------|-----------------------------|-------------------|-------------------------------|-------------------------------------------------------------------------------------------------------------------------|------------------|
| AML            | AML cells                   | MSC/stromal cells | /                             | Downregulating of KITL, CXCL12, IGF1;<br>Reducing support to normal hemopoiesis                                         | [52]             |
| AML            | AML cells                   | Stromal cells     | miR-155<br>miR-375<br>miR-150 | Reducing secretion of cytokines and growth factor;<br>Affecting retention and differentiation of HSC in the bone marrow | [54]             |
| AML/MDS        | AML/MDS cells               | MSC               | miR-7977                      | Reducing the hemopoiesis supportive capacity                                                                            | [55]             |
| CLL            | CLL cells                   | MSC               | miR-202-3p                    | Promoting migration, survival and proliferation                                                                         | [32]             |
| CLL            | Plasma                      | Stromal cells     | /                             | Production of VEGF, promoting survival of B cells                                                                       | [26]             |
| CLL            | CLL cells                   | Stromal cells     | miR-146a<br>miR-451           | Favoring transition toward cancer-associated fibroblasts                                                                | [58]             |
| CML            | CML cells                   | Stromal cells     | /                             | IL-8 production, promoting CML cell function                                                                            | [59,60]          |
| CML            | CML cells                   | MSC               | /                             | Increasing the expression of TGF- $\beta$ 1 with the promotion of CML cell proliferation                                | [61]             |
| CML            | CML cells                   | MSC               | miR-711                       | Weakening the adhesive ability                                                                                          | [62]             |
| CML            | CML cells                   | MSC               | miR-320                       | Inhibiting osteogenesis                                                                                                 | [63]             |
| MM             | MM cells                    | MSC               | /                             | Suppressing osteoblastic differentiation ability                                                                        | [68]             |
| MM             | MM cells                    | MSC               | lncRNA RUNX2-AS1              | Repressing osteogenesis                                                                                                 | [71]             |
| MM             | Stromal cells               | MM cells          | miR-10a                       | Inhibition of cell proliferation                                                                                        | [72]             |
| MM             | MM cells                    | MSC               | miR-146a                      | Inducing the secretion of cytokines and promoting MM cell viability and migration                                       | [73]             |
| HL             | HL cells                    | Fibroblasts       | /                             | Inducing inflammatory phenotype and supporting tumor growth                                                             | [76]             |

**Supplementary Table S3.** Summary of current studies on EVs: signals from the microenvironment

| <b>Disease</b> | <b>EV origin</b>  | <b>Target</b>           | <b>Cargo</b> | <b>Ffunctional effects</b>                | <b>Reference</b> |
|----------------|-------------------|-------------------------|--------------|-------------------------------------------|------------------|
| AML            | Stromal cells     | AML cells               | FGF-2        | Protecting from TKIs                      | [78]             |
| MPN            | MSC               | MPN CD34+ cells         | miR-155      | Promoting clonogenic ability              | [80]             |
| CML            | Endothelial cells | CML leukemic stem cells | miR-126      | Supporting quiescence and leukemia growth | [81]             |
| CLL            | MSC               | CLL B cells             | /            | Promoting viability and chemoresistance   | [57]             |
| MM             | MSC               | MM cells                | LINC00461    | Promoting proliferation                   | [84]             |
| MM             | MSC               | MM cells                | miR-15a      | Promoting MM cell growth                  | [82]             |

**Supplementary Table S4.** Summary of current studies on EVs: normal hemopoiesis restrain/transformation

| <b>Disease</b> | <b>EV origin/source</b> | <b>Target</b>                    | <b>Cargo</b>     | <b>Functional effect</b>                             | <b>Reference</b> |
|----------------|-------------------------|----------------------------------|------------------|------------------------------------------------------|------------------|
| AML            | AML cells               | CD34+ cells                      | miR-4532         | Repressing normal hemopoietic function               | [89]             |
| AML            | AML cells/plasma        | Long-Term hemopoietic stem cells | miR-1246         | Inducing quiescence and eliciting DNA damage         | [90]             |
| AML            | AML cells/plasma        | Hemopoietic stem cells           | miR-150, miR-155 | Suppressing hemopoietic function by inhibiting c-MYB | [92]             |
| CML            | CML cells               | /                                | BCR-ABL          | Promoting in vivo development of CML                 | [93]             |
| CML            | CML cells               | Mononuclear cells                | miR-146b-5p      | Promoting leukemic transformation                    | [94]             |

**Supplementary Table S5.** Summary of current studies on EVs: angiogenesis promotion

| <b>Disease</b> | <b>EV origin</b>                   | <b>Target</b>                      | <b>Cargo</b>                       | <b>Functional effects</b>                                  | <b>Reference</b> |
|----------------|------------------------------------|------------------------------------|------------------------------------|------------------------------------------------------------|------------------|
| AML            | Acute Promyelocytic Leukemia cells | Endothelial cells                  | Tissue factor, VEGF, IL-8          | Endothelial stimulating activity                           | [95]             |
| AML            | AML cells                          | Endothelial cells                  | VEGF, VEGFR                        | Promoting vascular remodeling                              | [96]             |
| CML            | CML cells                          | Endothelial cells                  | miR-126<br>miR-92a                 | Increasing survival, motility and vascular tube formation  | [97,98,99]       |
| MM             | Hypoxic MM cells                   | Endothelial cells                  | miR-135b                           | Promoting angiogenesis                                     | [105]            |
| MM             | MM cells                           | Endothelial cells                  | Piwi-interacting RNA-823           | Promoting proliferation, tube formation and migration      | [108]            |
| Lymphoma       | Lymphoma cells                     | Endothelial cells<br>Stromal cells | Angiogenic proteins including VEGF | Stimulating angiogenesis                                   | [109]            |
| Lymphoma       | T-cell leukemia/lymphoma           | MSC                                | miR-21, miR-155, VEGF              | Increasing proliferation and angiogenic markers expression | [110]            |

**Supplementary Table S6.** Summary of current studies on EVs: immune evasion

| <b>Disease</b> | <b>EV<br/>origin/source</b>   | <b>Target</b>              | <b>Cargo</b>                                 | <b>Functional<br/>effects</b>                                                                                      | <b>Reference</b> |
|----------------|-------------------------------|----------------------------|----------------------------------------------|--------------------------------------------------------------------------------------------------------------------|------------------|
| AML            | Serum                         | Normal NK cells            | /                                            | Decreasing toxicity and NKG2D expression                                                                           | [21]             |
| MF             | Monocytes                     | /                          | Inflammatory cytokines                       | Promoting Ruxolitinb-driven inflammatory signaling                                                                 | [116]            |
| CML            | CML cells                     | MSC                        | /                                            | Modulating the inflammatory molecules (TNF-alpha and NO) and the redox potential                                   | [115]            |
| CLL            | Monocytes                     | /                          | miR-155                                      | Promoting differentiation into MDSC                                                                                | [119]            |
| CLL            | CLL cells                     | CD4+ T cells               | miR-363                                      | Promoting migration, immunological signaling, interactions with tumor cells                                        | [122]            |
| CLL            | CLL cells                     | Monocytes/fibroblasts      | mRNA                                         | Spreading tumor signaling (splicing factors, the TCL1A oncogene, and tyrosine kinases) within the microenvironment | [120]            |
| MM             | Stromal cells                 | MDSCs                      | /                                            | Promoting MDSC survival and suppressive activity on T cells                                                        | [123]            |
| Lymphoma       | Lymphoma cells                | NK cells                   | NKG2D ligand MICA/B and ULBP1/2              | Inhibiting NK cell cytotoxicity                                                                                    | [113]            |
| Lymphoma       | EBV-associated lymphoma cells | Monocytes/macrophages      | EBV-derived non-coding RNAs such as BART miR | Inducing an immune regulatory phenotype                                                                            | [126]            |
| Lymphoma       | HL cells                      | Immune cells               | CD30 receptor                                | Educating distant immune cells stimulating their IL-8 release                                                      | [131]            |
| Lymphoma       | B cells                       | Mast cells and macrophages | MYD88                                        | Activating pro-inflammatory signaling                                                                              | [132]            |

**Supplementary Table S7.** Summary of current studies on EVs: hypercoagulability

| Disease | EV origin/source | Target     | Cargo     | Functional effects              | Reference |
|---------|------------------|------------|-----------|---------------------------------|-----------|
| AML     | AML cells        | /          | TF and PS | Promoting procoagulant activity | [133]     |
| CMML    | CMML monocytes   | Normal MSC | TF        | Promoting procoagulant activity | [136]     |
| MPN     | plasma           | /          | TF        | Biomarker of thrombotic events  | [142]     |

**Supplementary Table S8.** Summary of current studies on EVs: drug resistance

| <b>Disease</b> | <b>EV origin/source</b>      | <b>Target</b>                | <b>Cargo</b>                       | <b>Functional effects</b>                                                         | <b>Reference</b> |
|----------------|------------------------------|------------------------------|------------------------------------|-----------------------------------------------------------------------------------|------------------|
| AML            | Chemoresistant AML cells     | Chemosensitive AML cells     | miR-19b, miR-20a                   | Inducing expression chemoresistance biomarkers                                    | [145]            |
| AML            | Stromal cells                | AML cells                    | miR-155, miR-375<br>TGF- $\beta$ 1 | Inducing chemoresistance                                                          | [147]            |
| AML            | Leukemic stem cells          | /                            | miR-34c-5p                         | Favoring chemoresistance and senescence driven-eradication of leukemic stem cells | [146]            |
| CML            | Imatinib-resistant CML cells | Imatinib sensitive CML cells | miR-365                            | Conferring drug resistance                                                        | [150]            |
| CML            | Chemoresistant CML cells     | Chemosensitive CML cells     | P-gp                               | Inducing metabolic switch towards multidrug resistance phenotype                  | [151]            |
| MM             | MM cells/plasma              | /                            | miR-16, miR-15a, miR-20a, miR-17   | Biomarkers of resistance to Bortezomib                                            | [153]            |
| MM             | Stromal cells                | MM cells                     | /                                  | Inducing drug resistance to Bortezomib                                            | [154]            |
| MM             | MSC                          | MM cells                     | PSMA3 and PSMA3-AS1                | Transmitting proteasome inhibitor resistance                                      | [155]            |
| Lymphoma       | DLBCL serum                  | /                            | miR-99a, miR-125b                  | Correlating to chemoresistance                                                    | [157]            |
| Lymphoma       | B- cells                     | /                            | CD20                               | Capturing Rituximab and constraining therapeutic effectiveness                    | [158]            |
| Lymphoma       | Lymphoma cells               | /                            | ADAM10                             | Interfering with immunotherapy                                                    | [160]            |
